# Supplementary material
Source: PubMed Central journal article supplement (PMC9057873)
Supplement: Supp_FigS1.pdf [file Supp_FigS1.pdf]

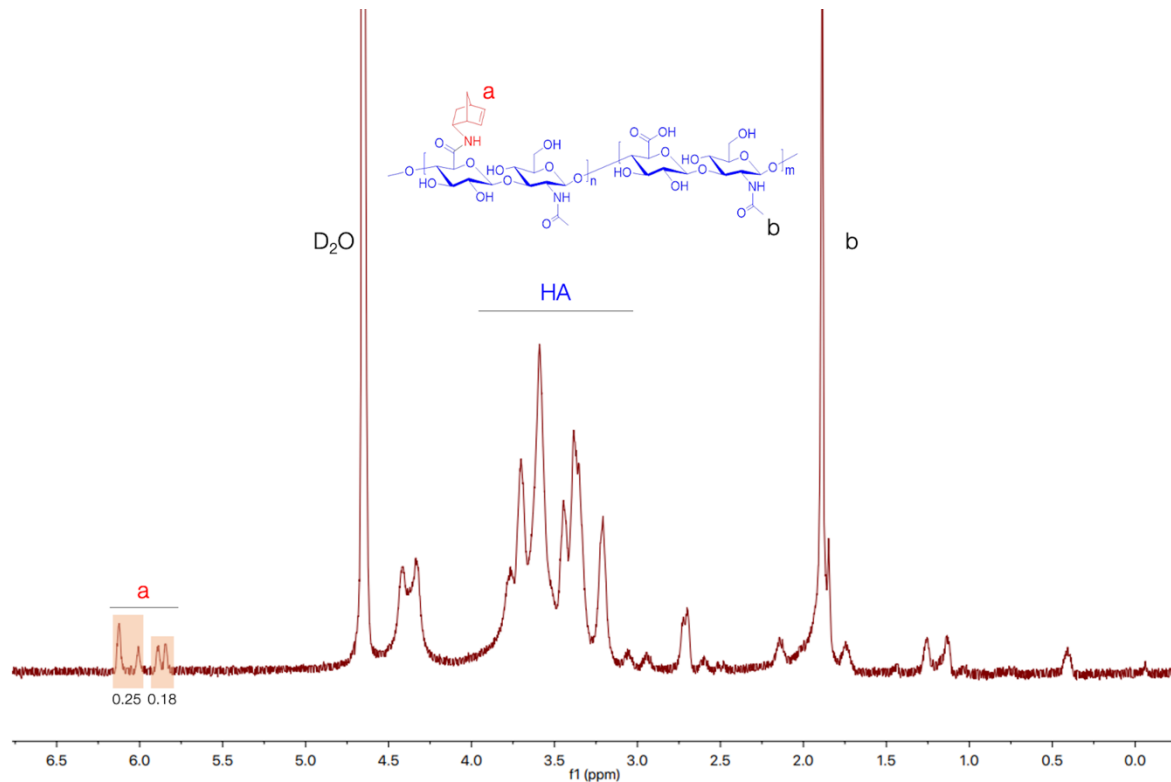

**Fig. S1:  $^1\text{H}$  NMR spectrum of norbornene-modified hyaluronic acid (NorHA).** Spectrum indicates  $\sim 22\%$  modification of HA repeat units with norbornene groups.
