# Supplementary material
Source: PubMed Central journal article supplement (PMC9057873)
Supplement: Supp_FigS2.pdf [file Supp_FigS2.pdf]

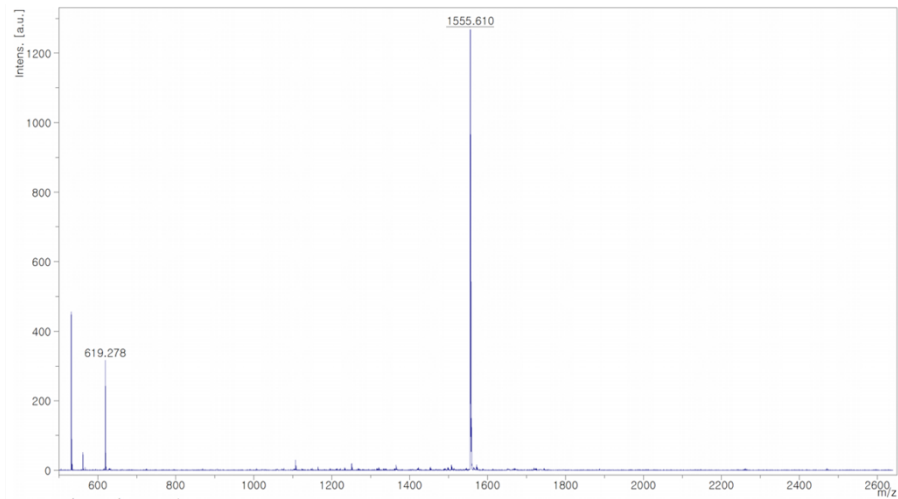

**Fig. S2: MALDI spectrum of MMP-degradable dithiol crosslinker.** Degradable dithiol peptide with sequence GCNSVPMSMRGGSNCG. Expected mass: 1557 g/mol. Actual mass: 1555 g/mol.
