# Supplementary material
Source: PubMed Central journal article supplement (PMC9057873)
Supplement: Supp_FigS3.pdf [file Supp_FigS3.pdf]

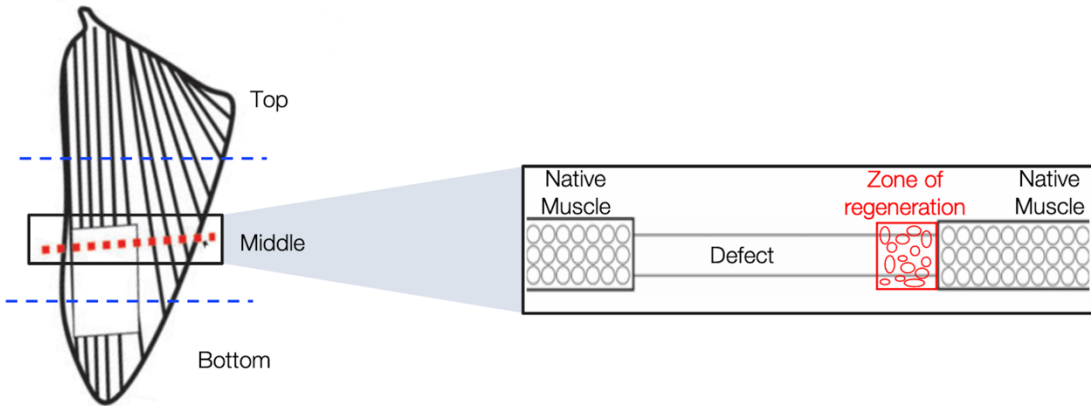

**Fig. S3: Schematic representation of zone of regeneration for histological and immunofluorescent imaging.** Cross-sectional images were acquired as confocal tile scans. The zone of regeneration was characterized by disorganized smaller diameter muscle fibers. The VML defect was marked by a thin layer of connective tissue with minimal cell infiltration. Schematic created with BioRender.
