# Supplementary material
Source: PubMed Central journal article supplement (PMC9057873)
Supplement: Supp_FigS5.pdf [file Supp_FigS5.pdf]

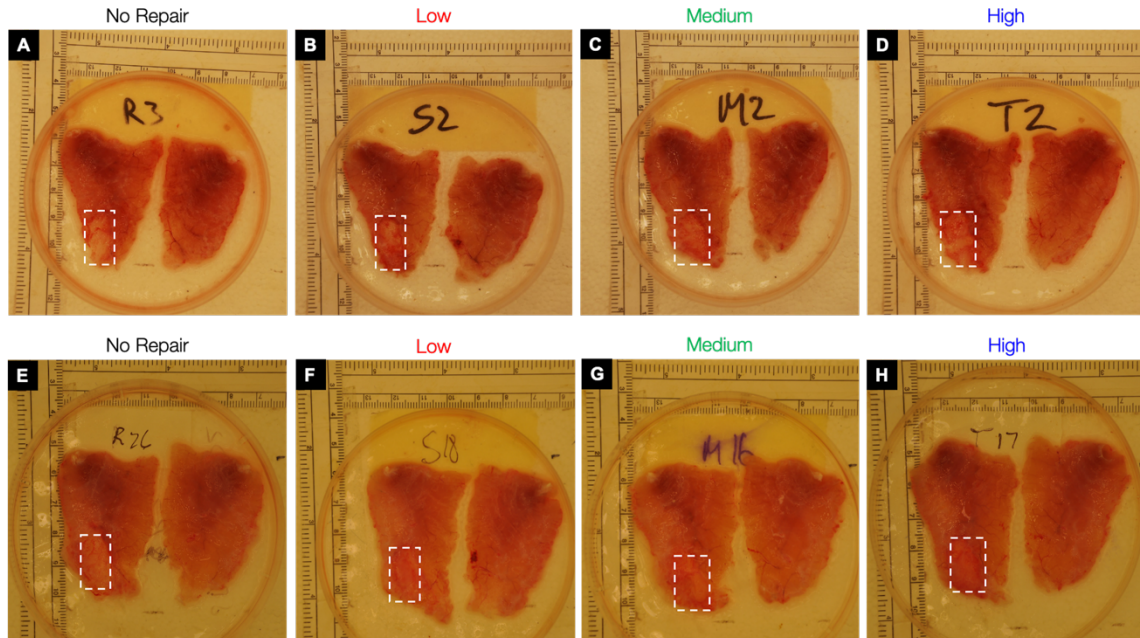

**Fig. S5: Gross tissue morphology 12 and 24 weeks post-VML.** At 12 weeks post-implantation, gross tissue morphology suggests superior tissue regeneration at the VML injury site (*white squares*) in hydrogel groups compared to no repair injuries. Similarly, after 24 weeks hydrogel treated tissues appear to have increased muscle volume at the defect site (*white squares*).
