# Supplementary material
Source: PubMed Central journal article supplement (PMC9057873)
Supplement: Supp_FigS6.pdf [file Supp_FigS6.pdf]

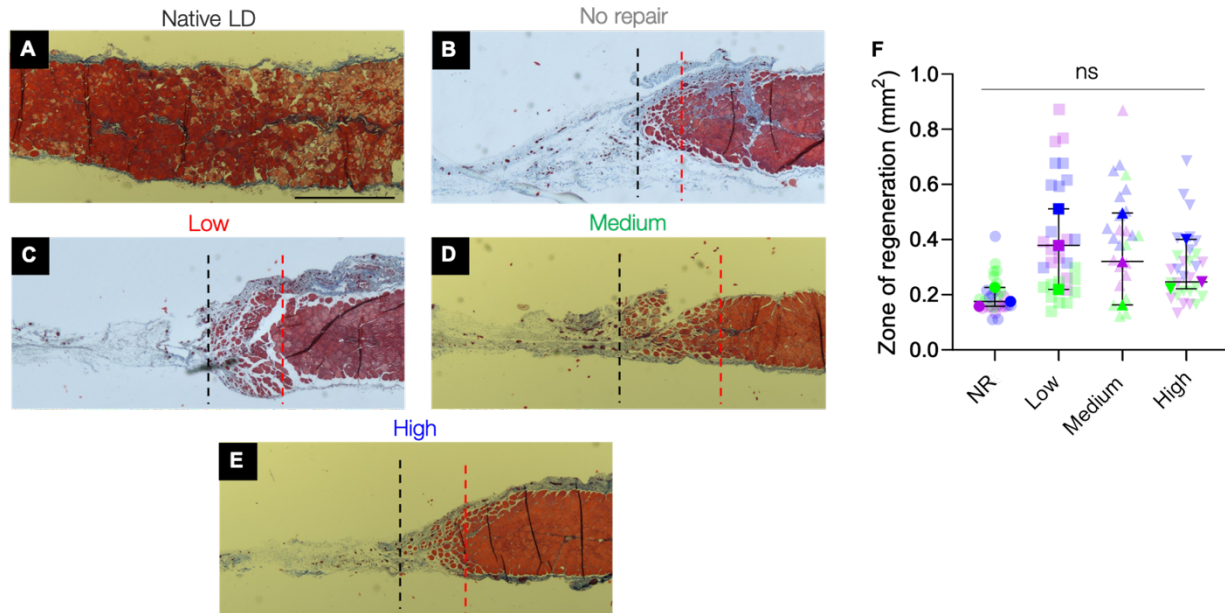

**Fig. S6: Histological analysis of LD muscles at 12 weeks.** (A-E) Tissue and cell morphology at the interface between native muscle and the VML injury was visualized by Masson's trichrome staining (muscle tissue in red, collagen deposition in blue, and nuclei in black). The area between the dashed red and black lines represents the zone of regeneration characterized by small disorganized myofibers. The red line denotes the interface between native muscle and VML injury site and the black line represents the last point at which detectable myofibers were present. (F) Quantification of the zone of regeneration at 12 weeks post-injury indicated similar levels of myogenesis across treated muscles. Colors denote different experimental muscles (biological replicates,  $n = 3$  per group) with solid shapes representing the median and translucent shapes representing individual muscle sections (technical replicates,  $n = 10$ ). Data presented as the median across 10 muscle sections. Scale bar: 1 mm.
