# Supplementary material
Source: PubMed Central journal article supplement (PMC9057873)
Supplement: Supp_FigS8.pdf [file Supp_FigS8.pdf]

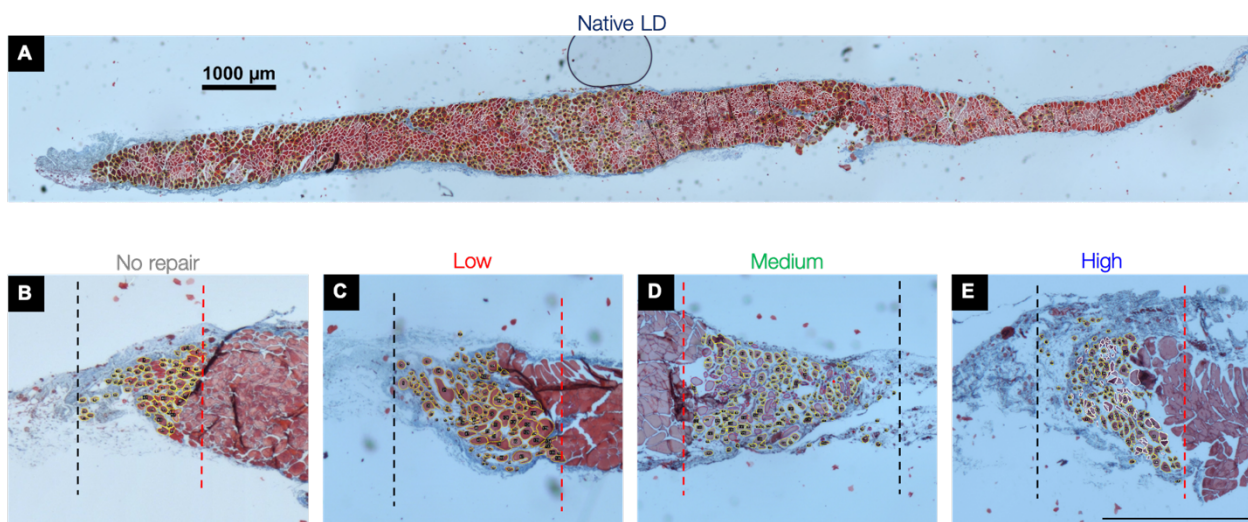

**Fig. S8: Analysis of minimum Feret diameter at 24 weeks post-VML.** (A) Minimum Feret diameter was quantified throughout the entirety of the LD muscle section using a semi-automated ImageJ processing pipeline and manual counting. (B-E) Minimum Feret diameter of regenerating fibers was assessed at the zone of regeneration across each experimental group using the same ImageJ pipeline and manual counting.  $n = 3$  muscles per experimental group. Scale bars: 1000 μm.
